# Supplementary material
Source: PubMed Central journal article supplement (PMC6608747)
Supplement: NIHMS1527101-supplement-Supplemental_Materials.pdf [file NIHMS1527101-supplement-Supplemental_Materials.pdf]

# Supplementary Materials

Table S1. Participant characteristics, including 300 members of 88 households.

Table S2. Crude 50% and 80% protection for PCR-confirmed infection.

Table S3. Crude 50% and 80% protection for symptomatic influenza.

Table S4. False discovery rates for multiple assay comparisons (combined seasons).

Table S5. False discovery rates for multiple assay comparisons (2015 season).

Table S6. False discovery rates for multiple assay comparisons (2013 season).

Table S1. Participant characteristics, including 300 members of 88 households.

|                                 |                                        | n   | %     |
|---------------------------------|----------------------------------------|-----|-------|
| Age                             | 0-14 years old<br>(mean 8 years old)   | 101 | 33.7% |
|                                 | 15-85 years old<br>(mean 35 years old) | 199 | 66.3% |
|                                 |                                        |     |       |
| Sex                             | Male                                   | 101 | 33.7% |
|                                 | Female                                 | 199 | 66.3% |
|                                 |                                        |     |       |
| Vaccinated for the study season | Yes                                    | 10  | 3.3%  |
|                                 | No                                     | 290 | 96.7% |
|                                 |                                        |     |       |
| Study season                    | 2013                                   | 102 | 34.0% |
|                                 | 2015                                   | 198 | 66.0% |
|                                 |                                        |     |       |
| Secondary attack rate           | PCR-confirmed infection                | 84  | 28%   |
|                                 | Symptomatic influenza                  | 53  | 17.7% |

Table S2. Crude 50% and 80% protection levels for PCR confirmed infection.

|                      | HI    | Full-length HA | HA stalk | NA  |
|----------------------|-------|----------------|----------|-----|
| All ages             |       |                |          |     |
| 50% protective level | 1:27  | 37             | 52       | 28  |
| 80% protective level | 1:167 | 483            | 107      | 254 |
|                      |       |                |          |     |
| Children             |       |                |          |     |
| 50% protective level | 1:45  | 46             | 34       | 32  |
| 80% protective level | 1:227 | 820            | 89       | 307 |
|                      |       |                |          |     |
| Adults               |       |                |          |     |
| 50% protective level | 1:20  | 53             | 69       | 22  |
| 80% protective level | 1:99  | 483            | 96       | 142 |

Table S3. Crude 50% and 80% protection levels for symptomatic influenza.

|                      | HI    | Full-length HA | HA stalk | NA   |
|----------------------|-------|----------------|----------|------|
| All ages             |       |                |          |      |
| 50% protective level | 1:35  | 1:18           | 1:31     | 1:15 |
| 80% protective level | 1:284 | 1:99           | 1:75     | 1:59 |
|                      |       |                |          |      |
| Children             |       |                |          |      |
| 50% protective level | 1:81  | 1:30           | 1:26     | 1:20 |
| 80% protective level | 1:209 | 1:301          | 1:60     | 1:97 |
|                      |       |                |          |      |
| Adults               |       |                |          |      |
| 50% protective level | 1:17  | 1:18           | 1:71     | 1:16 |
| 80% protective level | 1:77  | 1:101          | 1:88     | 1:23 |

Table S4. False discovery rates for multiple assay comparisons (combined seasons)  
(n=300 individuals).

False discovery rates (FDR) were calculated using the two-stage step-up method of Benjamini, Krieger and Yekutieli.

| Age      | Outcome                                 | Assay                | p-value   | 5% FDR    |            | 1% FDR    |            |
|----------|-----------------------------------------|----------------------|-----------|-----------|------------|-----------|------------|
|          |                                         |                      |           | q-value   | Discovery? | q-value   | Discovery? |
| All ages | PCR-confirmed influenza virus infection | HI                   | 1.210E-08 | 6.988E-08 | Yes        | 9.166E-08 | Yes        |
|          |                                         | Full-length HA ELISA | 1.8E-11   | 2.079E-10 | Yes        | 2.727E-10 | Yes        |
|          |                                         | HA stalk ELISA       | 2.560E-06 | 8.778E-06 | Yes        | 1.151E-05 | Yes        |
|          |                                         | NA ELISA             | 0.0010    | 0.0012    | Yes        | 0.0016    | Yes        |
|          | Symptomatic influenza                   | HI                   | 0.3964    | 0.2001    | No         | 0.2625    | No         |
|          |                                         | Full-length HA ELISA | 0.0501    | 0.0413    | Yes        | 0.0542    | No         |
|          |                                         | HA stalk ELISA       | 0.0066    | 0.0076    | Yes        | 0.0100    | No         |

|                      |                                         |                                         |          |           |           |           |           |
|----------------------|-----------------------------------------|-----------------------------------------|----------|-----------|-----------|-----------|-----------|
|                      |                                         | NA ELISA                                | 0.1232   | 0.0837    | No        | 0.1098    | No        |
| Children             | PCR-confirmed influenza virus infection | HI                                      | 0.0002   | 0.0003    | Yes       | 0.0004    | Yes       |
|                      |                                         | Full-length HA                          | 3.77E-06 | 8.778E-06 | Yes       | 1.151E-05 | Yes       |
|                      |                                         | HA stalk                                | 0.0002   | 0.0003    | Yes       | 0.0004    | Yes       |
|                      |                                         | NA                                      | 0.0103   | 0.0099    | Yes       | 0.0130    | No        |
|                      | Symptomatic influenza                   | HI                                      | 0.0956   | 0.0690    | No        | 0.0905    | No        |
|                      |                                         | Full-length HA ELISA                    | 0.2253   | 0.1370    | No        | 0.1797    | No        |
|                      |                                         | HA stalk ELISA                          | 0.3129   | 0.1807    | No        | 0.2370    | No        |
|                      |                                         | NA ELISA                                | 0.3984   | 0.2001    | No        | 0.2625    | No        |
|                      | Adults                                  | PCR-confirmed influenza virus infection | HI       | 5.25E-06  | 1.011E-05 | Yes       | 1.326E-05 |
| Full-length HA ELISA |                                         |                                         | 3.8E-06  | 8.778E-06 | Yes       | 1.151E-05 | Yes       |
| HA stalk             |                                         |                                         | 0.0080   | 0.0084    | Yes       | 0.0110    | No        |

|  |                          |                         |        |        |     |        |    |
|--|--------------------------|-------------------------|--------|--------|-----|--------|----|
|  |                          | ELISA                   |        |        |     |        |    |
|  |                          | NA ELISA                | 0.0135 | 0.0120 | Yes | 0.0157 | No |
|  | Symptomatic<br>influenza | HI                      | 0.3985 | 0.2001 | No  | 0.2625 | No |
|  |                          | Full-length<br>HA ELISA | 0.4944 | 0.2379 | No  | 0.3121 | No |
|  |                          | HA stalk<br>ELISA       | 0.1763 | 0.1131 | No  | 0.1484 | No |
|  |                          | NA ELISA                | 0.0874 | 0.0673 | No  | 0.0883 | No |

Table S5. False discovery rates for multiple assay comparisons (2015 season; n=198 individuals).

False discovery rates (FDR) were calculated using the two-stage step-up method of Benjamini, Krieger and Yekutieli.

| Age      | Outcome                                 | Assay                | p-value  | 5% FDR    |            | 1% FDR    |            |
|----------|-----------------------------------------|----------------------|----------|-----------|------------|-----------|------------|
|          |                                         |                      |          | q-value   | Discovery? | q-value   | Discovery? |
| All ages | PCR-confirmed influenza virus infection | HI                   | 0.0001   | 0.0002    | Yes        | 0.0003    | Yes        |
|          |                                         | Full-length HA ELISA | 5.33E-10 | 5.596E-09 | Yes        | 7.537E-09 | Yes        |
|          |                                         | HA stalk ELISA       | 1.35E-06 | 9.545E-06 | Yes        | 7.088E-06 | Yes        |
|          |                                         | NA ELISA             | 0.0013   | 0.0019    | Yes        | 0.0026    | Yes        |
|          |                                         | HI                   | 0.8385   | 0.3828    | No         | 0.5155    | No         |
|          | Symptomatic influenza                   | Full-length HA ELISA | 0.0154   | 0.0115    | Yes        | 0.0155    | No         |
|          |                                         | HA stalk ELISA       | 0.0028   | 0.0032    | Yes        | 0.0043    | Yes        |
|          |                                         |                      |          |           |            |           |            |



|          |                                         |                                         |                      |           |        |           |        |
|----------|-----------------------------------------|-----------------------------------------|----------------------|-----------|--------|-----------|--------|
|          |                                         | NA ELISA                                | 0.5340               | 0.2607    | No     | 0.3510    | No     |
| Children | PCR-confirmed influenza virus infection | HI                                      | 0.0037               | 0.0038    | Yes    | 0.0052    | Yes    |
|          |                                         | Full-length HA ELISA                    | 9.36E-06             | 3.276E-05 | Yes    | 4.412E-05 | Yes    |
|          |                                         | HA stalk ELISA                          | 2.84E-05             | 7.455E-05 | Yes    | 0.0001    | Yes    |
|          |                                         | NA ELISA                                | 0.0135               | 0.0109    | Yes    | 0.0146    | No     |
|          |                                         | HI                                      | 0.1717               | 0.0995    | No     | 0.1340    | No     |
|          | Symptomatic influenza                   | Full-length HA ELISA                    | 0.3622               | 0.1901    | No     | 0.2560    | No     |
|          |                                         | HA stalk ELISA                          | 0.5461               | 0.2607    | No     | 0.3510    | No     |
|          |                                         | NA ELISA                                | 0.9241               | 0.4043    | No     | 0.5444    | No     |
|          |                                         | PCR-confirmed influenza virus infection | HI                   | 0.0023    | 0.0031 | Yes       | 0.0041 |
|          | Adults                                  | PCR-confirmed influenza virus infection | Full-length HA ELISA | 4.94E-05  | 0.0001 | Yes       | 0.0001 |

|  |                          |                         |        |        |     |        |    |
|--|--------------------------|-------------------------|--------|--------|-----|--------|----|
|  |                          | HA stalk<br>ELISA       | 0.0108 | 0.0099 | Yes | 0.0134 | No |
|  |                          | NA ELISA                | 0.0113 | 0.0099 | Yes | 0.0134 | No |
|  | Symptomatic<br>influenza | HI                      | 0.0723 | 0.0475 | Yes | 0.0639 | No |
|  |                          | Full-length<br>HA ELISA | 0.1222 | 0.0755 | No  | 0.1016 | No |
|  |                          | HA stalk<br>ELISA       | 0.0465 | 0.0326 | Yes | 0.0438 | No |
|  |                          | NA ELISA                | 0.1801 | 0.0995 | No  | 0.1340 | No |
|  |                          |                         |        |        |     |        |    |

Table S6. False discovery rates for multiple assay comparisons (2013 season; n=102 individuals).

False discovery rates (FDR) were calculated using the two-stage step-up method of Benjamini, Krieger and Yekutieli.

| Age      | Outcome                                 | Assay                | p-value | 5% FDR  |            | 1% FDR  |            |
|----------|-----------------------------------------|----------------------|---------|---------|------------|---------|------------|
|          |                                         |                      |         | q-value | Discovery? | q-value | Discovery? |
| All ages | PCR-confirmed influenza virus infection | HI                   | 0.0005  | 0.0130  | Yes        | 0.0130  | No         |
|          |                                         | Full-length HA ELISA | 0.0119  | 0.0955  | No         | 0.0959  | No         |
|          |                                         | HA stalk ELISA       | 0.2871  | 0.5495  | No         | 0.5516  | No         |
|          |                                         | NA ELISA             | 0.2177  | 0.5259  | No         | 0.5278  | No         |
|          | Symptomatic influenza                   | HI                   | 0.3136  | 0.5495  | No         | 0.5516  | No         |
|          |                                         | Full-length HA ELISA | 0.4717  | 0.6702  | No         | 0.6727  | No         |
|          |                                         | HA stalk ELISA       | 0.9662  | 0.9723  | No         | 0.9759  | No         |
|          |                                         | NA ELISA             | 0.0453  | 0.2736  | No         | 0.2746  | No         |
| Children | PCR-confirmed influenza virus           | HI                   | 0.0793  | 0.2957  | No         | 0.2968  | No         |
|          |                                         | Full-length          | 0.1235  | 0.3369  | No         | 0.3381  | No         |

|                          |                          |                                               |                         |        |        |        |        |
|--------------------------|--------------------------|-----------------------------------------------|-------------------------|--------|--------|--------|--------|
|                          | infection                | HA ELISA                                      |                         |        |        |        |        |
|                          |                          | HA stalk<br>ELISA                             | 0.6757                  | 0.7417 | No     | 0.7445 | No     |
|                          |                          | NA ELISA                                      | 0.2589                  | 0.5495 | No     | 0.5516 | No     |
|                          | Symptomatic<br>influenza | HI                                            | 0.5770                  | 0.6967 | No     | 0.6993 | No     |
|                          |                          | Full-length<br>HA ELISA                       | 0.8644                  | 0.9076 | No     | 0.9110 | No     |
|                          |                          | HA stalk<br>ELISA                             | 0.6150                  | 0.7072 | No     | 0.7098 | No     |
|                          |                          | NA ELISA                                      | 0.0857                  | 0.2957 | No     | 0.2968 | No     |
|                          |                          | HI                                            | 0.0041                  | 0.0491 | Yes    | 0.0493 | No     |
|                          | Adults                   | PCR-confirmed<br>influenza virus<br>infection | Full-length<br>HA ELISA | 0.0668 | 0.2957 | No     | 0.2968 |
| HA stalk<br>ELISA        |                          |                                               | 0.4493                  | 0.6702 | No     | 0.6727 | No     |
| NA ELISA                 |                          |                                               | 0.5261                  | 0.6967 | No     | 0.6993 | No     |
| HI                       |                          |                                               | 0.5601                  | 0.6967 | No     | 0.6993 | No     |
| Symptomatic<br>influenza |                          | Full-length<br>HA ELISA                       | 0.1255                  | 0.3369 | No     | 0.3381 | No     |
|                          |                          | HA stalk<br>ELISA                             | 0.3290                  | 0.5495 | No     | 0.5516 | No     |
|                          |                          | NA ELISA                                      | 0.3413                  | 0.5495 | No     | 0.5516 | No     |
|                          |                          | NA ELISA                                      | 0.3413                  | 0.5495 | No     | 0.5516 | No     |
